# Supplementary material for: Clinicopathological features, treatment patterns, and prognosis of squamous cell carcinoma of the breast: an NCDB analysis
Source: Springer Nature journal article supplement (doi:10.1186/s12885-018-5212-x), 2019-01-08

# Supplemental Figure 1

**a**

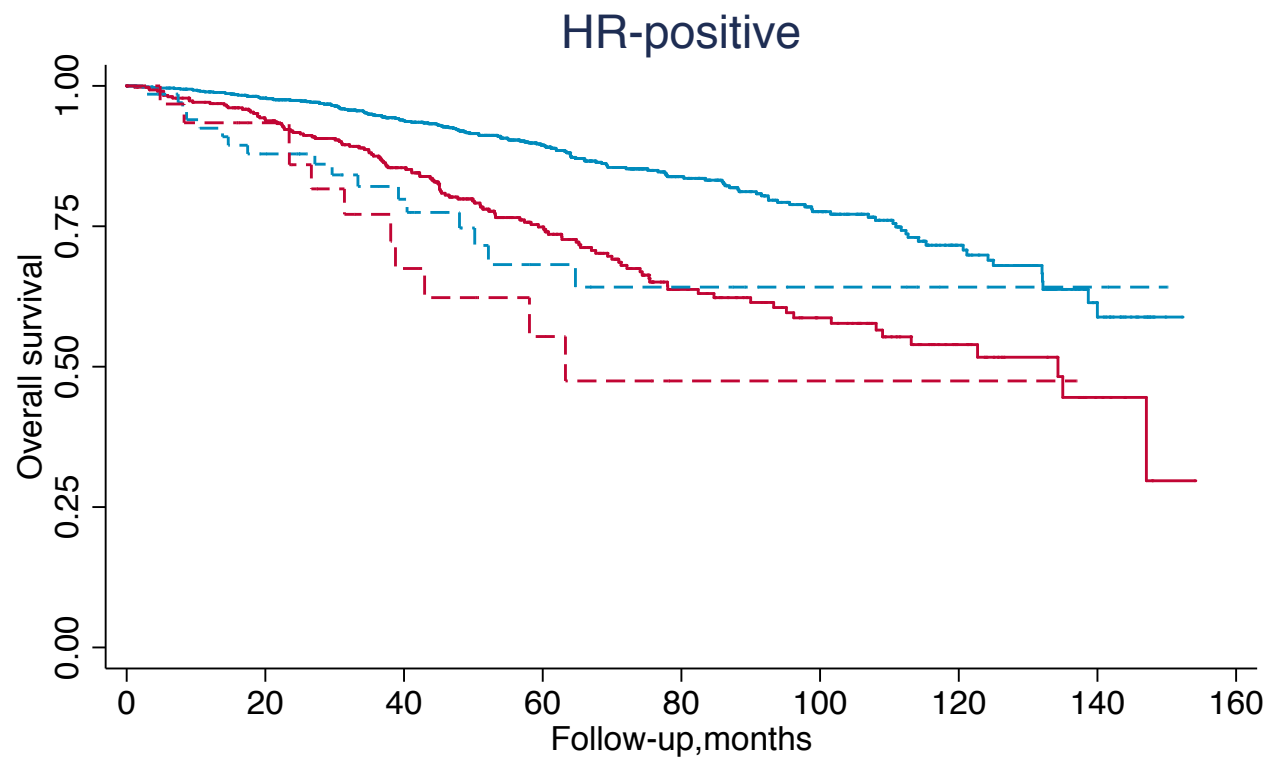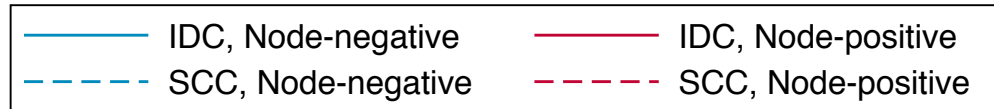

**b**

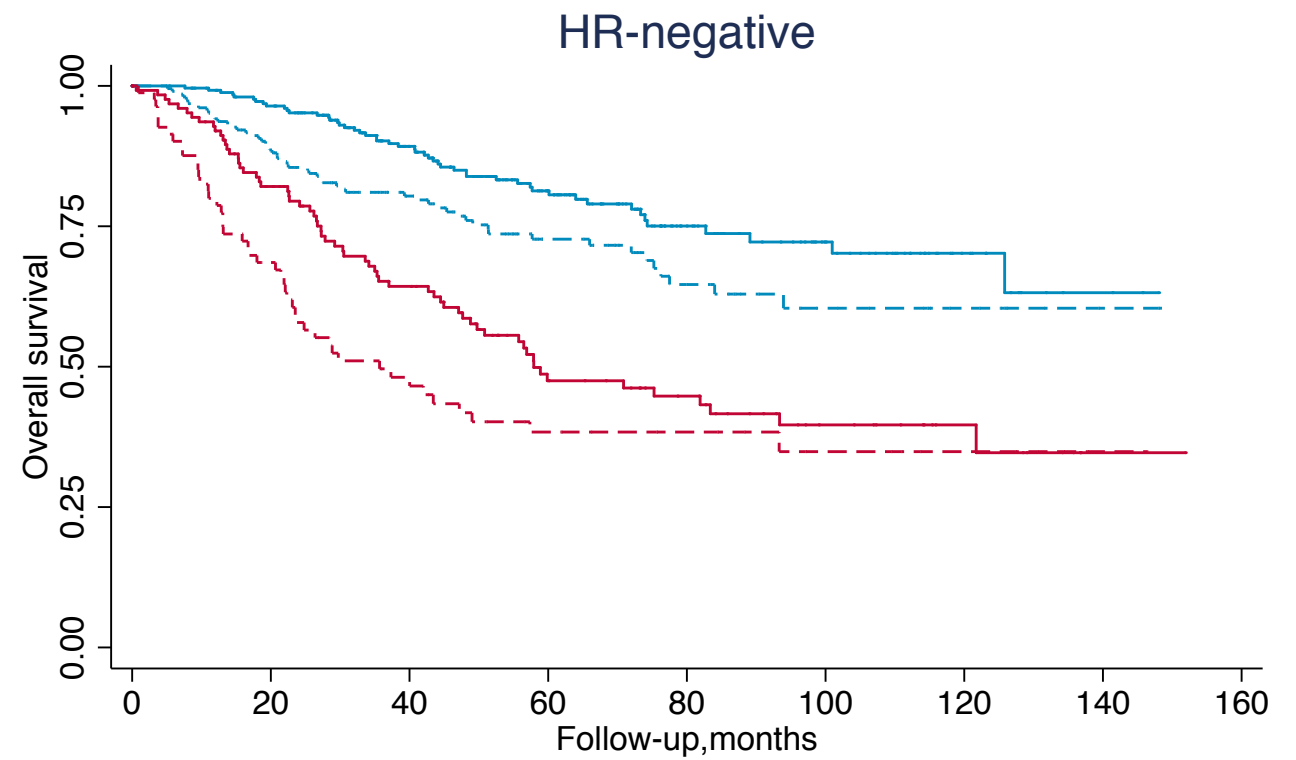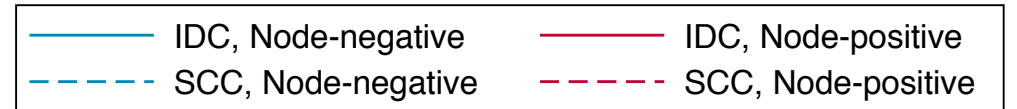

Supplement: MOESM1 [file 16385130]
